# Supplementary material for: A Metabolomics Approach for Predicting OATP1B-Type Transporter-Mediated Drug–Drug Interaction Liabilities
Source: MDPI journal article supplement (doi:10.3390/pharmaceutics14091933), 2022-09-13
Supplement: s1 [file s1]

Supplementary information for

## **A metabolomics approach for predicting OATP1B-type transporter-mediated drug-drug interaction liabilities**

Yang Li<sup>1,2</sup>, Yan Jin<sup>1</sup>, Hanieh Taheri<sup>1,2</sup>, Keith T. Schmidt<sup>3</sup>, Alice A. Gibson<sup>1</sup>, Stefan A. J. Buck<sup>4</sup>, Eric D. Eisenmann<sup>1</sup>, Ron H. J. Mathijssen<sup>4</sup>, William D. Figg<sup>3</sup>, Sharyn D. Baker<sup>1</sup>, Alex Sparreboom<sup>1</sup>, and Shuiying Hu<sup>1,2\*</sup>

<sup>1</sup> Division of Pharmaceutics and Pharmacology, College of Pharmacy & Comprehensive Cancer Center, The Ohio State University, Columbus, Ohio 43210, USA

<sup>2</sup> Division of Outcomes and Translational Sciences, College of Pharmacy & Comprehensive Cancer Center, The Ohio State University, Columbus, Ohio 43210, USA

<sup>3</sup> Clinical Pharmacology Program, Office of the Clinical Director, National Cancer Institute, Bethesda, Maryland 20892, USA

<sup>4</sup> Department of Medical Oncology, Erasmus Medical Center Cancer Institute, Dr. Molewaterplein 40, 3015 GD Rotterdam, The Netherlands

\* Correspondence: hu.1333@osu.edu; Tel.: +1-614-685-8028

**Supplementary Information Files:**

1. Figure S1
2. Figure S2
3. Figure S3
4. Figure S4
5. Table S1
6. Table S2

**Figure S1**

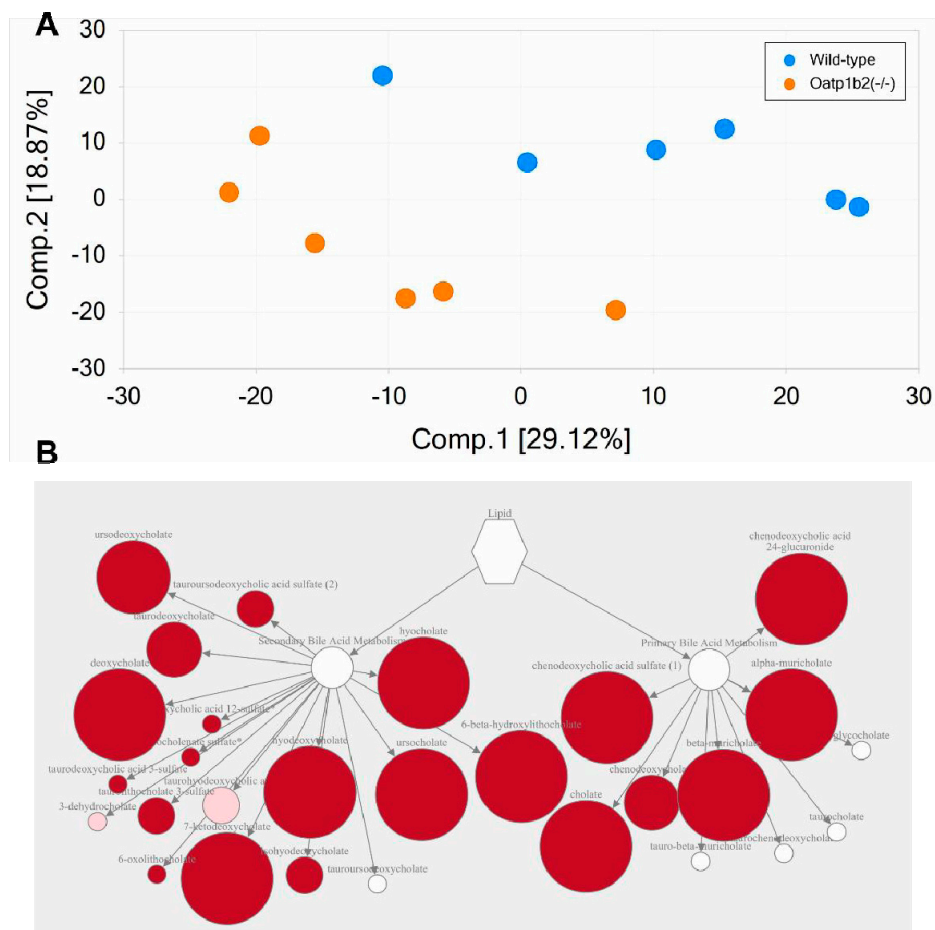

**Figure S1** Global untargeted metabolomics study from plasma of wild-type mice or Oatp1b2-deficient mice. (A) Principal component analysis (PCA) score plots based on the metabolic profiles. (B) Pathway analysis of primary bile acid metabolism and secondary bile acid metabolism.

**Figure S2**

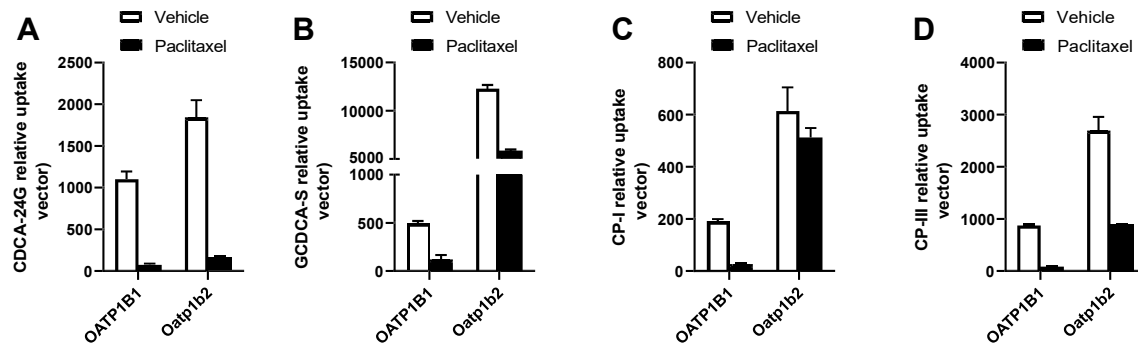

**Figure S2** Paclitaxel mediated inhibition of (A) CDCA-24G, (B) GCDCA-S, (C) CP-I, and (D) CP-III uptake in HEK293 cells overexpressing OATP1B1 or Oatp1b2. Uptake is expressed as percentage change compared with empty vector controls ( $n = 3$  per group). All data are presented as mean  $\pm$  SEM.

**Figure S3**

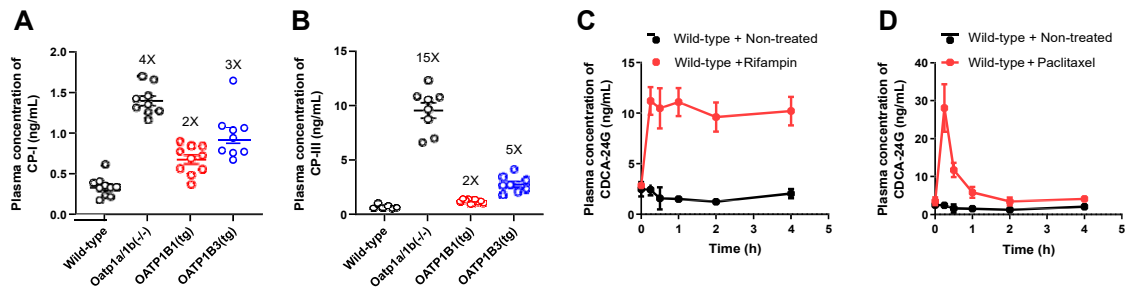

**Figure S3** Plasma levels of (A) CP-I, and (B) CP-III in wild-type mice, *Oatp1a/1b(-/-)* mice, OATP1B1(tg) mice, and OATP1B3 (tg) mice ( $n = 6-10$  per group). Plasma concentration-time profiles of CDCA-24G in wild-type mice receiving (C) rifampin (20 mg/kg, i.v.) or (D) paclitaxel (10 mg/kg, i.v.), All data are presented as mean  $\pm$  SEM.

**Figure S4**

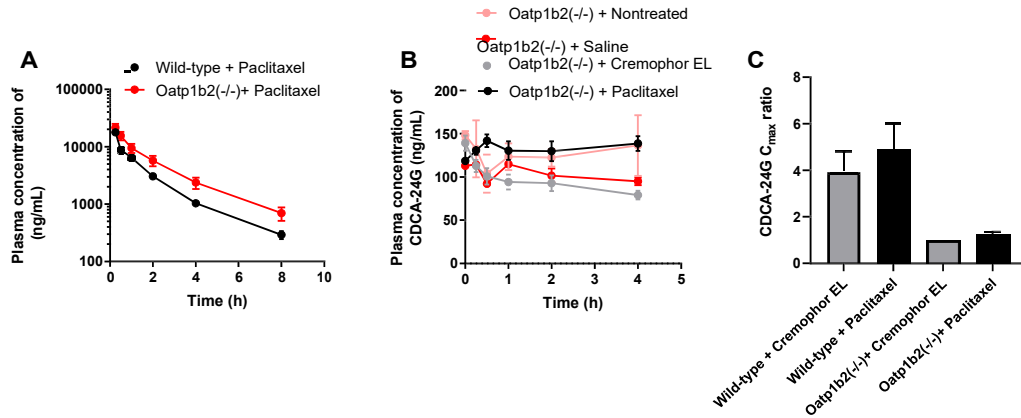

**Figure S4** (A) Plasma concentration time profiles of paclitaxel in wild-type mice and Oatp1b2-deficient mice. (B) Plasma concentration time profiles of CDCA-24G in Oatp1b2-deficient mice, and (C)  $C_{max}$  fold changes of CDCA-24G in wild-type mice and Oatp1b2-deficient mice receiving Cremophor EL/ethanol (1:1, v/v, 5 mL/kg, i.v.) or paclitaxel (10 mg/kg, 5 mL/kg, i.v.), ( $n = 3-5$  per group). All data are presented as mean  $\pm$  SEM.

**Table S1.** Differentially detected endogenous metabolites in untreated plasma of wild-type (WT) mice or Oatp1b2-deficient (KO) mice. Positive fold change indicates higher plasma concentration in Oatp1b2-deficient mice. Statistical analysis was performed using Welch's two-sample *t*-test.

| Biochemical Name                                | Fold of Change<br>KO<br>WT | P-value,<br>KO<br>WT | Mean<br>value<br>KO | Mean<br>value<br>WT | Sub Pathway                                           |
|-------------------------------------------------|----------------------------|----------------------|---------------------|---------------------|-------------------------------------------------------|
| chenodeoxycholic acid 24-glucuronide            | 97.9                       | <0.001               | 1.15                | .0120               | Primary Bile Acid Metabolism                          |
| alpha-muricholate                               | 45.2                       | <0.001               | 2.71                | .0600               | Primary Bile Acid Metabolism                          |
| ursocholate                                     | 33.8                       | <0.001               | 5.10                | .151                | Secondary Bile Acid Metabolism                        |
| 4-ethylphenylsulfate                            | 17.2                       | <0.001               | 4.08                | .238                | Benzoate Metabolism                                   |
| beta-muricholate                                | 15.2                       | <0.001               | 2.84                | .187                | Primary Bile Acid Metabolism                          |
| hyodeoxycholate                                 | 14.7                       | <0.001               | 3.94                | .269                | Secondary Bile Acid Metabolism                        |
| cholate                                         | 13.7                       | <0.001               | 3.61                | .263                | Primary Bile Acid Metabolism                          |
| 6-beta-hydroxylithocholate                      | 13.1                       | <0.001               | 1.16                | .0890               | Secondary Bile Acid Metabolism                        |
| octadecenedioylcarnitine (C18:1-DC)*            | 12.7                       | <0.001               | 2.35                | .185                | Fatty Acid Metabolism (Acyl Carnitine, Dicarboxylate) |
| p-cresol glucuronide*                           | 11.8                       | <0.001               | 5.92                | .503                | Tyrosine Metabolism                                   |
| deoxycholate                                    | 10.0                       | <0.001               | 2.50                | .249                | Secondary Bile Acid Metabolism                        |
| p-cresol sulfate                                | 9.29                       | <0.001               | 4.66                | .501                | Benzoate Metabolism                                   |
| 1-oleoyl-GPG (18:1)*                            | 8.19                       | <0.001               | 1.80                | .219                | Lysophospholipid                                      |
| dodecanedioate (C12-DC)                         | 8.12                       | <0.001               | 2.97                | .366                | Fatty Acid, Dicarboxylate                             |
| bilirubin degradation product, C17H20N2O5 (1)** | 7.14                       | <0.001               | 2.40                | .336                | Partially Characterized Molecules                     |
| bilirubin degradation product, C16H18N2O5 (1)** | 6.67                       | <0.001               | 1.23                | .185                | Partially Characterized Molecules                     |
| branched chain 14:0 dicarboxylic acid**         | 6.55                       | <0.001               | 1.80                | .275                | Fatty Acid, Dicarboxylate                             |
| chenodeoxycholic acid sulfate (1)               | 6.41                       | 0.006                | 1.02                | .160                | Primary Bile Acid Metabolism                          |
| 7-ketodeoxycholate                              | 6.23                       | 0.001                | 2.26                | .362                | Secondary Bile Acid Metabolism                        |
| bilirubin degradation product, C16H18N2O5 (3)** | 6.13                       | <0.001               | 1.96                | .319                | Partially Characterized Molecules                     |
| bilirubin (E,E)*                                | 6.12                       | <0.001               | 1.17                | .191                | Hemoglobin and Porphyrin Metabolism                   |
| hyocholate                                      | 5.64                       | <0.001               | 1.41                | .251                | Secondary Bile Acid Metabolism                        |
| bilirubin degradation product, C17H18N2O4 (2)** | 5.59                       | <0.001               | 2.14                | .382                | Partially Characterized Molecules                     |
| 1-palmitoyl-GPG (16:0)*                         | 5.40                       | <0.001               | 2.00                | .371                | Lysophospholipid                                      |
| eicosenedioate (C20:1-DC)*                      | 5.36                       | <0.001               | 1.80                | .335                | Fatty Acid, Dicarboxylate                             |
| bilirubin (Z,Z)                                 | 5.25                       | 0.001                | 1.48                | .282                | Hemoglobin and Porphyrin Metabolism                   |
| bilirubin degradation product, C17H18N2O4 (1)** | 5.05                       | <0.001               | 2.10                | .416                | Partially Characterized Molecules                     |
| 3-hydroxydodecanedioate*                        | 4.32                       | <0.001               | 1.64                | .380                | Fatty Acid, Dicarboxylate                             |
| 2-amino-p-cresol sulfate                        | 4.28                       | 0.001                | 1.86                | .435                | Benzoate Metabolism                                   |
| tetradecanedioate (C14-DC)                      | 4.27                       | <0.001               | 1.96                | .459                | Fatty Acid, Dicarboxylate                             |
| 1-stearoyl-GPG (18:0)                           | 4.16                       | <0.001               | 1.76                | .423                | Lysophospholipid                                      |
| biliverdin                                      | 4.09                       | <0.001               | 1.84                | .450                | Hemoglobin and Porphyrin Metabolism                   |

|                                                 |      |        |       |      |                                                      |
|-------------------------------------------------|------|--------|-------|------|------------------------------------------------------|
| ursodeoxycholate                                | 4.07 | 0.007  | 2.16  | .530 | Secondary Bile Acid Metabolism                       |
| dodecenedioate (C12:1-DC)*                      | 3.94 | <0.001 | 2.14  | .543 | Fatty Acid, Dicarboxylate                            |
| 1-linoleoyl-GPG (18:2)*                         | 3.71 | <0.001 | 1.96  | .529 | Lysophospholipid                                     |
| bilirubin degradation product, C17H18N2O4 (3)** | 3.65 | <0.001 | 1.81  | .496 | Partially Characterized Molecules                    |
| bilirubin degradation product, C16H18N2O5 (2)** | 3.62 | <0.001 | 1.75  | .482 | Partially Characterized Molecules                    |
| hexadecenedioate (C16:1-DC)*                    | 3.61 | <0.001 | 1.62  | .448 | Fatty Acid, Dicarboxylate                            |
| chenodeoxycholate                               | 3.57 | <0.001 | 2.09  | .585 | Primary Bile Acid Metabolism                         |
| bilirubin degradation product, C17H20N2O5 (2)** | 3.53 | <0.001 | 2.00  | .567 | Partially Characterized Molecules                    |
| octadecadienedioate (C18:2-DC)*                 | 3.48 | <0.001 | 1.88  | .540 | Fatty Acid, Dicarboxylate                            |
| N,N,N-trimethyl-5-aminovaleate                  | 3.45 | <0.001 | 2.06  | .597 | Lysine Metabolism                                    |
| taurodeoxycholate                               | 3.45 | 0.001  | 1.82  | .528 | Secondary Bile Acid Metabolism                       |
| enterolactone sulfate                           | 3.42 | <0.001 | 1.63  | .478 | Food Component/Plant                                 |
| glucuronate                                     | 3.17 | <0.001 | 1.59  | .500 | Aminosugar Metabolism                                |
| 2-hydroxy-3-methylvalerate                      | 3.15 | 0.004  | 2.33  | .738 | Leucine, Isoleucine and Valine Metabolism            |
| bilirubin degradation product, C16H18N2O5 (4)** | 3.06 | <0.001 | 1.58  | .514 | Partially Characterized Molecules                    |
| undecanedioate (C11-DC)                         | 3.00 | <0.001 | 1.96  | .654 | Fatty Acid, Dicarboxylate                            |
| octadecenedioate (C18:1-DC)                     | 2.66 | <0.001 | 1.45  | .544 | Fatty Acid, Dicarboxylate                            |
| equol sulfate                                   | 2.58 | <0.001 | 1.62  | .626 | Food Component/Plant                                 |
| isohyodeoxycholate                              | 2.46 | 0.009  | 0.940 | .382 | Secondary Bile Acid Metabolism                       |
| phenylpropionylglycine                          | 2.41 | 0.006  | 1.58  | .656 | Benzoate Metabolism                                  |
| 1-linoleoyl-GPA (18:2)*                         | 2.36 | 0.003  | 1.41  | .595 | Lysophospholipid                                     |
| alpha-hydroxyisocaproate                        | 2.29 | 0.01   | 1.80  | .787 | Leucine, Isoleucine and Valine Metabolism            |
| tauroolithocholate 3-sulfate                    | 2.25 | 0.02   | 0.960 | .425 | Secondary Bile Acid Metabolism                       |
| tauroursodeoxycholic acid sulfate (2)           | 2.18 | 0.01   | 1.12  | .513 | Secondary Bile Acid Metabolism                       |
| 1-(1-enyl-oleoyl)-GPE (P-18:1)*                 | 2.16 | <0.001 | 1.45  | .672 | Lysoplasmalogen                                      |
| pregnenediol disulfate (C21H34O8S2)*            | 2.14 | 0.03   | 1.16  | .540 | Pregnenolone Steroids                                |
| 4-acetamidobenzoate                             | 2.14 | 0.004  | 1.46  | .685 | Chemical                                             |
| 1-linolenoyl-GPC (18:3)*                        | 2.13 | <0.001 | 1.41  | .661 | Lysophospholipid                                     |
| glucuronide of C10H18O2 (11)*                   | 2.12 | 0.001  | 1.57  | .737 | Partially Characterized Molecules                    |
| glucuronide of C14H22O4 (1)*                    | 2.12 | <0.001 | 1.47  | .690 | Partially Characterized Molecules                    |
| hexadecanedioate (C16-DC)                       | 2.10 | 0.001  | 1.57  | .749 | Fatty Acid, Dicarboxylate                            |
| tetradecadienedioate (C14:2-DC)*                | 2.09 | 0.006  | 1.58  | .756 | Fatty Acid, Dicarboxylate                            |
| inosine                                         | 2.07 | 0.03   | 1.49  | .719 | Purine Metabolism, (Hypo)Xanthine/Inosine containing |
| 1-oleoyl-GPE (18:1)                             | 2.05 | <0.001 | 1.30  | .634 | Lysophospholipid                                     |
| α-tocopherol                                    | 2.03 | <0.001 | 1.44  | .707 | Tocopherol Metabolism                                |
| 1,2-dipalmitoyl-GPE (16:0/16:0)*                | 2.02 | 0.001  | 1.34  | .664 | Phosphatidylethanolamine (PE)                        |
| 1-oleoyl-2-arachidonoyl-GPI (18:1/20:4)*        | 2.01 | 0.01   | 1.37  | .681 | Phosphatidylinositol (PI)                            |
| cinnamoylglycine                                | 1.99 | 0.02   | 1.54  | .776 | Food Component/Plant                                 |



|                                              |      |        |      |      |                                                              |
|----------------------------------------------|------|--------|------|------|--------------------------------------------------------------|
| 1-palmitoleoyl-GPC (16:1)*                   | 1.97 | <0.001 | 1.31 | .666 | Lysophospholipid                                             |
| 2-palmitoleoyl-GPC (16:1)*                   | 1.95 | 0.002  | 1.36 | .696 | Lysophospholipid                                             |
| 1-linoleoyl-GPE (18:2)*                      | 1.94 | 0.004  | 1.42 | .736 | Lysophospholipid                                             |
| 4-ethylcatechol sulfate                      | 1.93 | 0.001  | 1.56 | .807 | Benzoate Metabolism                                          |
| arachidonoylcarnitine (C20:4)                | 1.92 | <0.001 | 1.53 | .796 | Fatty Acid Metabolism (Acyl Carnitine, Polyunsaturated)      |
| linolenoylcarnitine (C18:3)*                 | 1.91 | <0.001 | 1.51 | .794 | Fatty Acid Metabolism (Acyl Carnitine, Polyunsaturated)      |
| equol glucuronide                            | 1.90 | 0.006  | 1.35 | .709 | Food Component/Plant                                         |
| phenol glucuronide                           | 1.87 | 0.02   | 1.28 | .684 | Tyrosine Metabolism                                          |
| 1-oleoyl-GPI (18:1)                          | 1.87 | 0.002  | 1.36 | .729 | Lysophospholipid                                             |
| 1-palmitoleoyl-2-linolenoyl-GPC (16:1/18:3)* | 1.86 | 0.002  | 1.46 | .784 | Phosphatidylcholine (PC)                                     |
| 5-methyl-2'-deoxycytidine                    | 1.83 | 0.002  | 1.56 | .852 | Pyrimidine Metabolism, Cytidine containing                   |
| 4-hydroxycinnamate sulfate                   | 1.81 | 0.009  | 1.28 | .707 | Tyrosine Metabolism                                          |
| 1-arachidonoyl-GPA (20:4)                    | 1.80 | 0.008  | 1.17 | .652 | Lysophospholipid                                             |
| 1-(1-enyl-palmitoyl)-GPE (P-16:0)*           | 1.79 | <0.001 | 1.30 | .725 | Lysoplasmalogen                                              |
| 1-oleoyl-GPC (18:1)                          | 1.78 | <0.001 | 1.30 | .732 | Lysophospholipid                                             |
| 2,8-quinolinediol sulfate                    | 1.78 | 0.03   | 1.68 | .946 | Food Component/Plant                                         |
| pentadecanoylcarnitine (C15)*                | 1.77 | <0.001 | 1.28 | .723 | Fatty Acid Metabolism (Acyl Carnitine, Long Chain Saturated) |
| pyridoxamine                                 | 1.77 | <0.001 | 1.42 | .805 | Vitamin B6 Metabolism                                        |
| dihomo-linoleoylcarnitine (C20:2)*           | 1.75 | <0.001 | 1.37 | .785 | Fatty Acid Metabolism (Acyl Carnitine, Polyunsaturated)      |
| 1-palmitoyl-GPE (16:0)                       | 1.73 | <0.001 | 1.33 | .765 | Lysophospholipid                                             |
| butyrylglycine                               | 1.72 | 0.007  | 1.28 | .744 | Fatty Acid Metabolism (also BCAA Metabolism)                 |
| dihomo-linolenoylcarnitine (C20:3n3 or 6)*   | 1.72 | <0.001 | 1.37 | .795 | Fatty Acid Metabolism (Acyl Carnitine, Polyunsaturated)      |
| 1-(1-enyl-stearoyl)-GPE (P-18:0)*            | 1.72 | <0.001 | 1.28 | .747 | Lysoplasmalogen                                              |
| alpha-hydroxyisovalerate                     | 1.68 | 0.003  | 1.43 | .850 | Leucine, Isoleucine and Valine Metabolism                    |
| heptadecanedioate (C17-DC)                   | 1.66 | 0.001  | 1.36 | .818 | Fatty Acid, Dicarboxylate                                    |
| 1-linoleoyl-GPI (18:2)*                      | 1.65 | 0.02   | 1.27 | .765 | Lysophospholipid                                             |
| 1-ribosyl-imidazoleacetate*                  | 1.64 | 0.05   | 1.34 | .818 | Histidine Metabolism                                         |
| palmitoleoylcarnitine (C16:1)*               | 1.63 | 0.02   | 1.54 | .943 | Fatty Acid Metabolism (Acyl Carnitine, Monounsaturated)      |
| 1-arachidonoyl-GPC (20:4n6)*                 | 1.63 | <0.001 | 1.27 | .775 | Lysophospholipid                                             |
| octanoylcarnitine (C8)                       | 1.62 | 0.03   | 1.47 | .910 | Fatty Acid Metabolism (Acyl Carnitine, Medium Chain)         |
| linoleoylcarnitine (C18:2)*                  | 1.62 | 0.004  | 1.36 | .838 | Fatty Acid Metabolism (Acyl Carnitine, Polyunsaturated)      |
| 1-linoleoyl-GPC (18:2)                       | 1.62 | <0.001 | 1.22 | .752 | Lysophospholipid                                             |
| 3-phenylpropionate (hydrocinnamate)          | 1.62 | 0.04   | 1.39 | .855 | Benzoate Metabolism                                          |
| cinnamate                                    | 1.60 | 0.04   | 1.56 | .975 | Food Component/Plant                                         |
| hexanoylglycine                              | 1.59 | 0.05   | 1.40 | .880 | Fatty Acid Metabolism (Acyl Glycine)                         |
| margaroylcarnitine (C17)*                    | 1.59 | 0.001  | 1.21 | .764 | Fatty Acid Metabolism (Acyl Carnitine, Long Chain Saturated) |
| 1-(1-enyl-palmitoyl)-GPC (P-16:0)*           | 1.59 | <0.001 | 1.26 | .795 | Lysoplasmalogen                                              |
| taurodeoxycholic acid 3-sulfate              | 1.58 | 0.04   | 1.10 | .694 | Secondary Bile Acid Metabolism                               |

|                                                        |      |        |       |      |                                                              |
|--------------------------------------------------------|------|--------|-------|------|--------------------------------------------------------------|
| isocaproylglycine                                      | 1.57 | 0.02   | 1.28  | .815 | Fatty Acid Metabolism (Acyl Glycine)                         |
| glycerophosphoethanolamine                             | 1.57 | 0.002  | 1.31  | .831 | Phospholipid Metabolism                                      |
| oleoylcarnitine (C18:1)                                | 1.56 | 0.02   | 1.40  | .900 | Fatty Acid Metabolism (Acyl Carnitine, Monounsaturated)      |
| mannitol/sorbitol                                      | 1.55 | 0.008  | 1.24  | .800 | Fructose, Mannose and Galactose Metabolism                   |
| 4-vinylphenol sulfate                                  | 1.55 | 0.004  | 1.32  | .847 | Benzoate Metabolism                                          |
| hydroquinone sulfate                                   | 1.55 | 0.02   | 1.32  | .849 | Drug - Topical Agents                                        |
| valerylglycine                                         | 1.53 | 0.03   | 1.28  | .838 | Fatty Acid Metabolism (Acyl Glycine)                         |
| heptanoyl glycine                                      | 1.52 | 0.05   | 1.32  | .868 | Fatty Acid Metabolism (Acyl Glycine)                         |
| 1-linoleoyl-2-linolenoyl-GPC (18:2/18:3)*              | 1.51 | 0.03   | 1.40  | .923 | Phosphatidylcholine (PC)                                     |
| indolin-2-one                                          | 1.51 | 0.01   | 1.20  | .797 | Food Component/Plant                                         |
| stearamide (18:0)                                      | 1.49 | 0.01   | 1.19  | .800 | Fatty Acid, Amide                                            |
| 1-arachidonoyl-GPE (20:4n6)*                           | 1.49 | 0.01   | 1.20  | .803 | Lysophospholipid                                             |
| 6-hydroxyindole sulfate                                | 1.49 | 0.01   | 1.14  | .762 | Chemical                                                     |
| 3-indoxyl sulfate                                      | 1.48 | 0.02   | 1.19  | .804 | Tryptophan Metabolism                                        |
| 1-linoleoyl-2-arachidonoyl-GPE (18:2/20:4)*            | 1.48 | 0.03   | 1.26  | .854 | Phosphatidylethanolamine (PE)                                |
| 1-arachidonoyl-GPI (20:4)*                             | 1.48 | 0.02   | 1.11  | .754 | Lysophospholipid                                             |
| pyridoxal                                              | 1.47 | <0.001 | 1.28  | .868 | Vitamin B6 Metabolism                                        |
| phenylacetylglutamate                                  | 1.46 | 0.04   | 1.24  | .850 | Acetylated Peptides                                          |
| eicosadienamide (20:2)*                                | 1.46 | 0.02   | 1.27  | .869 | Fatty Acid, Amide                                            |
| 5-dodecenoylcarnitine (C12:1)                          | 1.46 | 0.04   | 1.37  | .936 | Fatty Acid Metabolism (Acyl Carnitine, Monounsaturated)      |
| 1-palmitoyl-2-oleoyl-GPE (16:0/18:1)                   | 1.46 | 0.04   | 1.24  | .847 | Phosphatidylethanolamine (PE)                                |
| 1-(1-enyl-palmitoyl)-2-arachidonoyl-GPC (P-16:0/20:4)* | 1.46 | 0.001  | 1.30  | .891 | Plasmalogen                                                  |
| margaramide (17:0)*                                    | 1.45 | 0.009  | 1.19  | .826 | Fatty Acid, Amide                                            |
| sebacate (C10-DC)                                      | 1.44 | 0.02   | 1.20  | .833 | Fatty Acid, Dicarboxylate                                    |
| nonadecanedioate (C19-DC)                              | 1.44 | 0.005  | 1.30  | .902 | Fatty Acid, Dicarboxylate                                    |
| eicosenamide (20:1)*                                   | 1.43 | 0.03   | 1.27  | .885 | Fatty Acid, Amide                                            |
| 6-oxolithocholate                                      | 1.43 | 0.04   | 0.970 | .678 | Secondary Bile Acid Metabolism                               |
| N-acetylkynurenine (2)                                 | 1.41 | 0.003  | 1.17  | .827 | Tryptophan Metabolism                                        |
| ethyl beta-glucopyranoside                             | 1.41 | 0.02   | 1.17  | .826 | Food Component/Plant                                         |
| phenol sulfate                                         | 1.40 | 0.03   | 1.23  | .879 | Tyrosine Metabolism                                          |
| beta-hydroxyisovalerate                                | 1.40 | 0.005  | 1.17  | .835 | Leucine, Isoleucine and Valine Metabolism                    |
| isobutyrylcarnitine (C4)                               | 1.40 | 0.02   | 1.15  | .817 | Leucine, Isoleucine and Valine Metabolism                    |
| N-acetylmethionine sulfoxide                           | 1.40 | 0.05   | 1.31  | .931 | Methionine, Cysteine, SAM and Taurine Metabolism             |
| palmitamide (16:0)                                     | 1.40 | 0.007  | 1.18  | .840 | Fatty Acid, Amide                                            |
| nonadecenamide (19:1)*                                 | 1.39 | 0.03   | 1.27  | .917 | Fatty Acid, Amide                                            |
| myristoylcarnitine (C14)                               | 1.39 | 0.04   | 1.26  | .904 | Fatty Acid Metabolism (Acyl Carnitine, Long Chain Saturated) |
| tigloylglycine                                         | 1.38 | 0.02   | 1.22  | .883 | Leucine, Isoleucine and Valine Metabolism                    |
| octadecanedioate (C18-DC)                              | 1.38 | 0.003  | 1.27  | .916 | Fatty Acid, Dicarboxylate                                    |

|                                                        |      |        |      |      |                                                              |
|--------------------------------------------------------|------|--------|------|------|--------------------------------------------------------------|
| oleamide                                               | 1.38 | 0.01   | 1.22 | .886 | Fatty Acid, Amide                                            |
| heptadecenamide (17:1)*                                | 1.37 | 0.03   | 1.29 | .939 | Fatty Acid, Amide                                            |
| linoleamide (18:2n6)                                   | 1.36 | 0.04   | 1.29 | .945 | Fatty Acid, Amide                                            |
| arachidoylcarnitine (C20)*                             | 1.36 | 0.01   | 1.21 | .889 | Fatty Acid Metabolism (Acyl Carnitine, Long Chain Saturated) |
| 1-linoleoyl-2-arachidonoyl-GPC (18:2/20:4n6)*          | 1.36 | 0.007  | 1.15 | .846 | Phosphatidylcholine (PC)                                     |
| 1-lignoceroyl-GPC (24:0)                               | 1.36 | 0.007  | 1.16 | .847 | Lysophospholipid                                             |
| sphingomyelin (d18:2/14:0, d18:1/14:1)*                | 1.36 | 0.03   | 1.14 | .839 | Sphingomyelins                                               |
| N4-acetylcytidine                                      | 1.36 | 0.003  | 1.12 | .819 | Pyrimidine Metabolism, Cytidine containing                   |
| N-acetylhomocitrulline                                 | 1.35 | 0.001  | 1.17 | .861 | Urea cycle; Arginine and Proline Metabolism                  |
| 2,3-dihydroxy-5-methylthio-4-pentenoate (DMTPA)*       | 1.34 | 0.01   | 1.23 | .915 | Methionine, Cysteine, SAM and Taurine Metabolism             |
| glycerophosphorylcholine (GPC)                         | 1.34 | <0.001 | 1.12 | .836 | Phospholipid Metabolism                                      |
| 1-oleoyl-2-docosahexaenoyl-GPC (18:1/22:6)*            | 1.34 | 0.001  | 1.17 | .874 | Phosphatidylcholine (PC)                                     |
| 1-stearoyl-GPE (18:0)                                  | 1.34 | 0.002  | 1.16 | .867 | Lysophospholipid                                             |
| 1-(1-enyl-palmitoyl)-2-linoleoyl-GPE (P-16:0/18:2)*    | 1.34 | 0.03   | 1.16 | .862 | Plasmalogen                                                  |
| 1-(1-enyl-palmitoyl)-2-arachidonoyl-GPE (P-16:0/20:4)* | 1.34 | 0.005  | 1.13 | .839 | Plasmalogen                                                  |
| pyridoxate                                             | 1.34 | 0.02   | 1.21 | .902 | Vitamin B6 Metabolism                                        |
| 1-(1-enyl-stearoyl)-2-arachidonoyl-GPE (P-18:0/20:4)*  | 1.33 | 0.01   | 1.10 | .828 | Plasmalogen                                                  |
| 1-(1-enyl-palmitoyl)-2-oleoyl-GPE (P-16:0/18:1)*       | 1.32 | 0.03   | 1.18 | .895 | Plasmalogen                                                  |
| sphingomyelin (d17:1/14:0, d16:1/15:0)*                | 1.32 | 0.03   | 1.02 | .769 | Sphingomyelins                                               |
| 1,2-dipalmitoyl-GPC (16:0/16:0)                        | 1.31 | 0.02   | 1.18 | .901 | Phosphatidylcholine (PC)                                     |
| erythritol                                             | 1.31 | 0.008  | 1.22 | .927 | Food Component/Plant                                         |
| histidine betaine (hercynine)*                         | 1.31 | 0.04   | 1.09 | .830 | Food Component/Plant                                         |
| 1-palmitoyl-2-oleoyl-GPC (16:0/18:1)                   | 1.30 | 0.02   | 1.08 | .834 | Phosphatidylcholine (PC)                                     |
| 2-(4-hydroxyphenyl)propionate                          | 1.30 | 0.01   | 1.16 | .895 | Benzoate Metabolism                                          |
| 1-palmitoyl-GPC (16:0)                                 | 1.29 | <0.001 | 1.12 | .868 | Lysophospholipid                                             |
| 4-cholesten-3-one                                      | 1.29 | 0.01   | 1.12 | .870 | Sterol                                                       |
| taurochenolate sulfate*                                | 1.29 | 0.05   | 1.08 | .838 | Secondary Bile Acid Metabolism                               |
| stachydrine                                            | 1.29 | 0.01   | 1.15 | .893 | Food Component/Plant                                         |
| hypotaurine                                            | 1.28 | 0.009  | 1.14 | .887 | Methionine, Cysteine, SAM and Taurine Metabolism             |
| 7-alpha-hydroxy-3-oxo-4-cholestenoate (7-Hoca)         | 1.27 | 0.05   | 1.20 | .944 | Sterol                                                       |
| methylphosphate                                        | 1.27 | 0.02   | 1.08 | .848 | Purine and Pyrimidine Metabolism                             |
| 3-hydroxy-2-ethylpropionate                            | 1.25 | 0.01   | 1.10 | .879 | Leucine, Isoleucine and Valine Metabolism                    |
| deoxycholic acid 12-sulfate*                           | 1.25 | 0.04   | 1.06 | .851 | Secondary Bile Acid Metabolism                               |
| pantothenate                                           | 1.25 | 0.01   | 1.07 | .856 | Pantothenate and CoA Metabolism                              |
| N-acetyl-3-methylhistidine*                            | 1.24 | 0.006  | 1.09 | .878 | Histidine Metabolism                                         |
| 1-(1-enyl-palmitoyl)-2-palmitoyl-GPC (P-16:0/16:0)*    | 1.24 | 0.01   | 1.14 | .919 | Plasmalogen                                                  |
| mevalonate                                             | 1.24 | 0.05   | 1.15 | .925 | Mevalonate Metabolism                                        |
| gamma-glutamylglycine                                  | 1.23 | 0.02   | 1.17 | .950 | Gamma-glutamyl Amino Acid                                    |

|                                         |      |      |      |      |                                                       |
|-----------------------------------------|------|------|------|------|-------------------------------------------------------|
| cholesterol sulfate                     | 1.23 | 0.03 | 1.08 | .875 | Sterol                                                |
| isocitric lactone                       | 1.22 | 0.05 | 1.08 | .884 | TCA Cycle                                             |
| 1-stearoyl-2-oleoyl-GPC (18:0/18:1)     | 1.20 | 0.04 | 1.07 | .892 | Phosphatidylcholine (PC)                              |
| S-methylglutathione                     | 1.19 | 0.04 | 1.11 | .931 | Glutathione Metabolism                                |
| homostachydrine*                        | 1.19 | 0.04 | 1.09 | .915 | Food Component/Plant                                  |
| octadecanedioylcarnitine (C18-DC)*      | 1.16 | 0.05 | 1.00 | .860 | Fatty Acid Metabolism (Acyl Carnitine, Dicarboxylate) |
| 2-O-methylascorbic acid                 | 1.16 | 0.03 | 1.08 | .927 | Ascorbate and Aldarate Metabolism                     |
| (N(1) + N(8))-acetylspermidine          | 1.15 | 0.02 | 1.07 | .931 | Polyamine Metabolism                                  |
| 1-palmitoyl-2-stearoyl-GPC (16:0/18:0)  | 1.14 | 0.01 | 1.09 | .960 | Phosphatidylcholine (PC)                              |
| sphingomyelin (d18:1/14:0, d16:1/16:0)* | 1.14 | 0.04 | 1.06 | .930 | Sphingomyelins                                        |
| sphingomyelin (d18:2/16:0, d18:1/16:1)* | 1.13 | 0.02 | 1.06 | .940 | Sphingomyelins                                        |
| pipecolate                              | 1.12 | 0.03 | 1.05 | .938 | Lysine Metabolism                                     |
| adenosine 5'-monophosphate (AMP)        | 1.12 | 0.04 | 1.04 | .927 | Purine Metabolism, Adenine containing                 |
| glycine                                 | 1.12 | 0.04 | 1.06 | .944 | Glycine, Serine and Threonine Metabolism              |

\* Indicates compounds that have not been officially confirmed based on a standard, but we are confident in its identity.

\*\* Indicates a compound for which a standard is not available, but we are reasonably confident in its identity or the information provided.

**Table S2.** The inhibition of OATP1B1 and OATP1B3 transporters.

| Inhibitor    | OATP1B1<br>IC <sub>50</sub> (μM) | OATP1B3<br>IC <sub>50</sub> (μM) | C <sub>max</sub> (μM) | f <sub>u,p</sub> (%) | 1+((f <sub>u,p</sub> × C <sub>max</sub> )/IC <sub>50</sub> ) | Citation<br>(PMID)               |
|--------------|----------------------------------|----------------------------------|-----------------------|----------------------|--------------------------------------------------------------|----------------------------------|
| Rifampin     | 1.50                             | 2.60                             | 29.0                  | 11.0                 | OATP1B1: 3.13<br>OATP1B3: 2.23                               | 18321482<br>35456528             |
| Paclitaxel   | 0.0300                           | 0.500                            | 9.60                  | 3.60-7.90            | OATP1B1: 26.3<br>OATP1B3: 2.52                               | 18321482<br>28612269<br>10997930 |
| Cabazitaxel  | N/A                              | N/A                              | 0.193                 | 8.00-11.0            | N/A                                                          | 27796539<br>23299792             |
| Cremophor EL | 633                              | 3.33                             | 2490                  | 100                  | OATP1B1: 4.92<br>OATP1B3: 746                                | 11129729<br>22808947<br>12844327 |
